# Supplementary material for: Optimizing Motor Imagery Parameters for Robotic Arm Control by Brain-Computer Interface
Source: MDPI journal article supplement (doi:10.3390/brainsci12070833), 2022-06-26
Supplement: s1 [file s1]

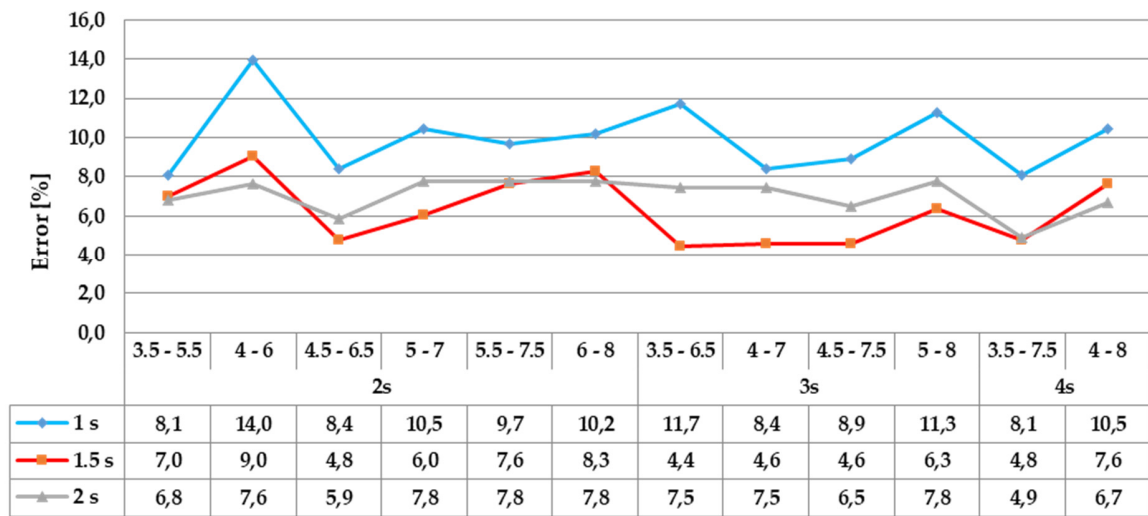

**Figure S1.** Subject S1, Mean errors for different CSP time windows and three variance time windows

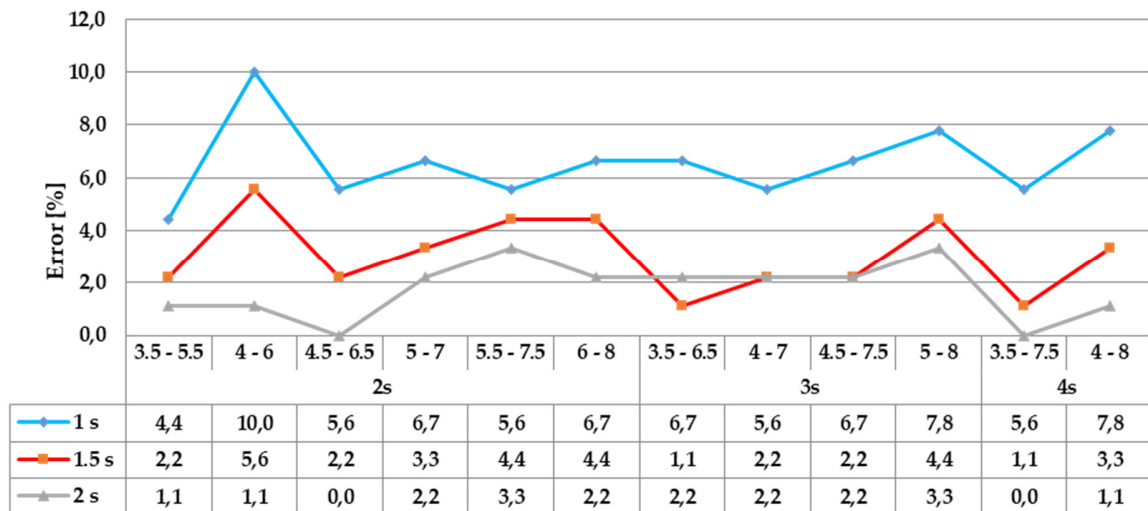

**Figure S2.** Subject S1, Minimal errors for different CSP time windows and three variance time windows

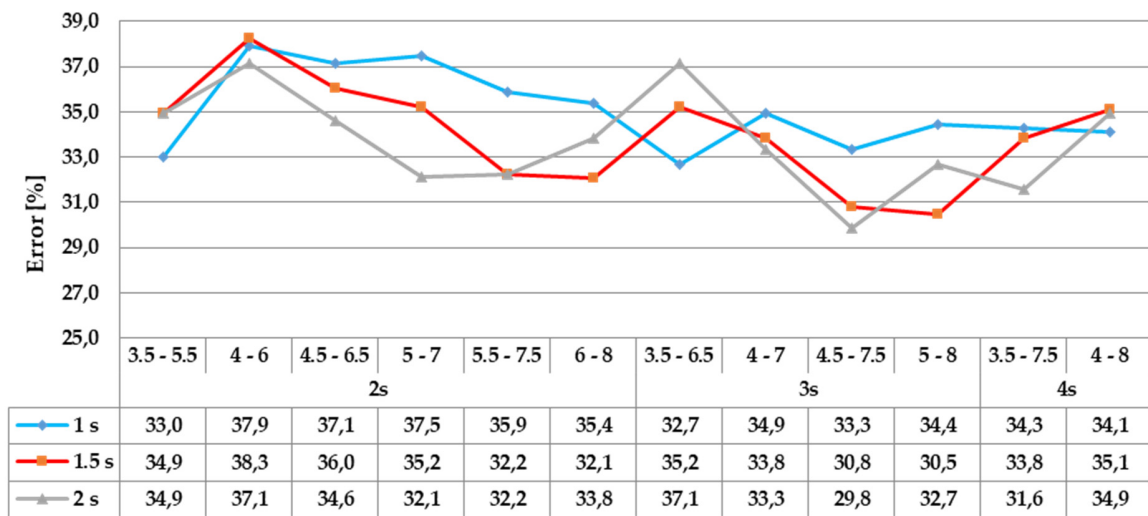

**Figure S3.** Subject S2, Mean errors for different CSP time windows and three variance time windows

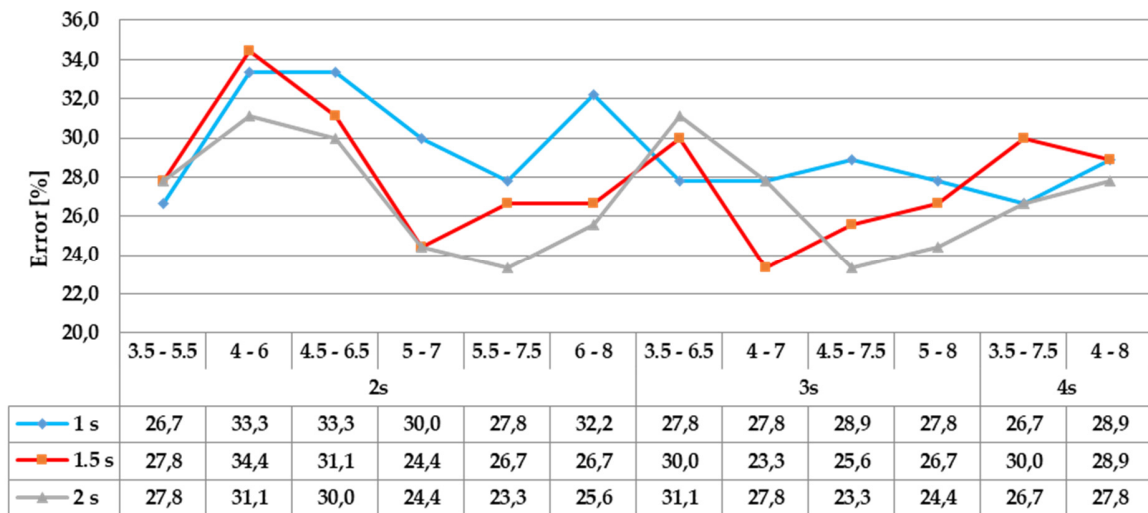

**Figure S4.** Subject S2, Minimal errors for different CSP time windows and three variance time windows

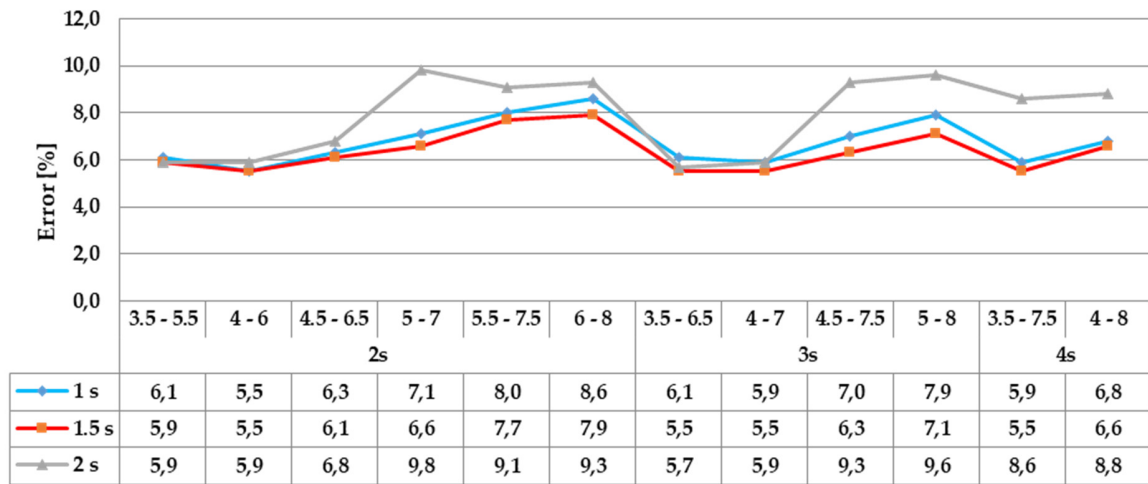

**Figure S5.** Subject S3, Mean errors for different CSP time windows and three variance time windows

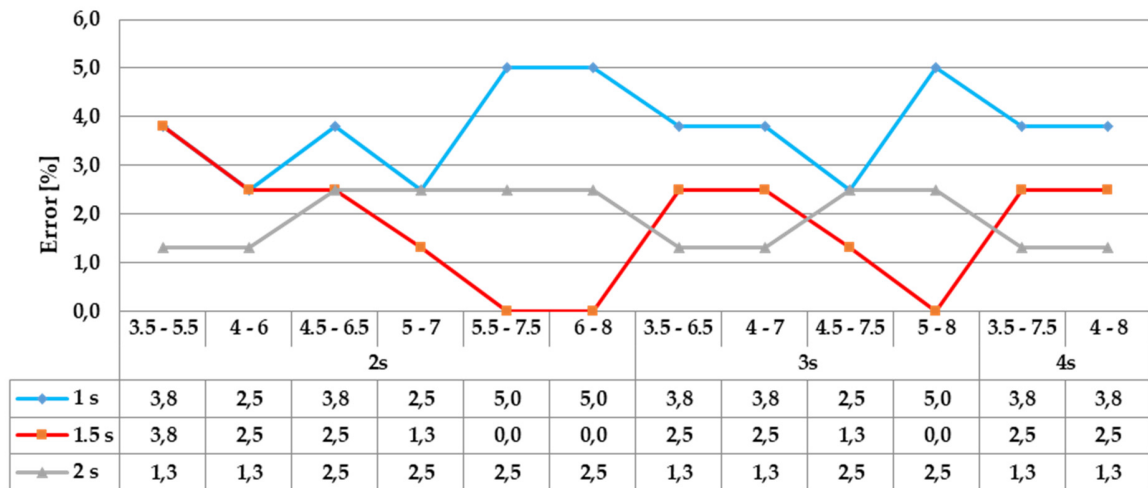

**Figure S6.** Subject S3, Minimal errors for different CSP time windows and three variance time windows

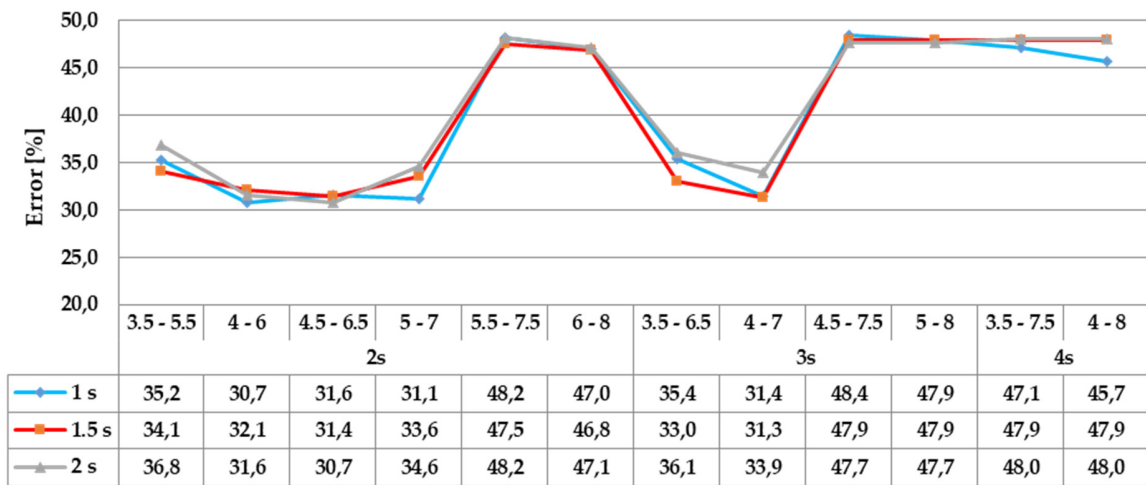

**Figure S7.** Subject S4, Mean errors for different CSP time windows and three variance time windows

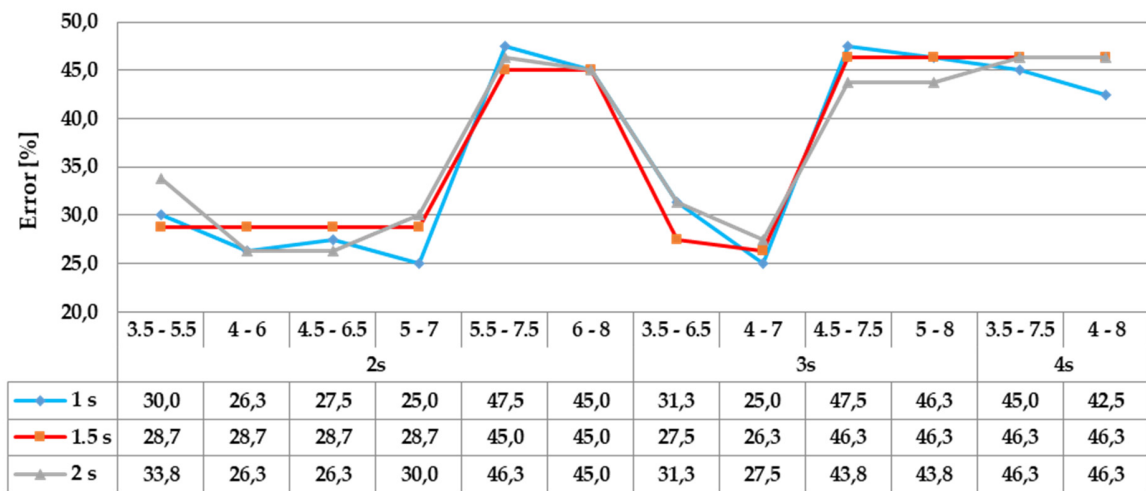

**Figure S8.** Subject S4, Minimal errors for different CSP time windows and three variance time windows

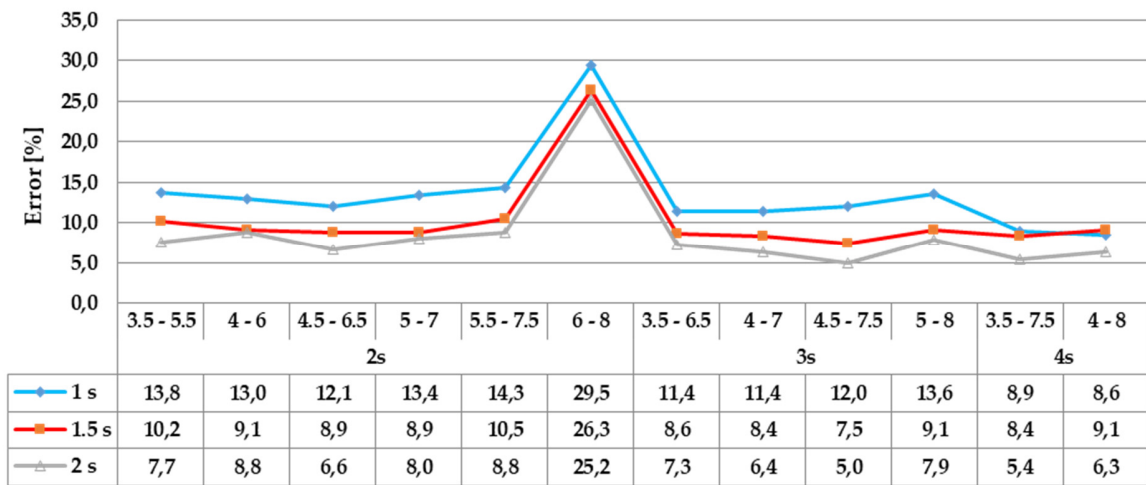

**Figure S9.** Subject S5, Mean errors for different CSP time windows and three variance time windows

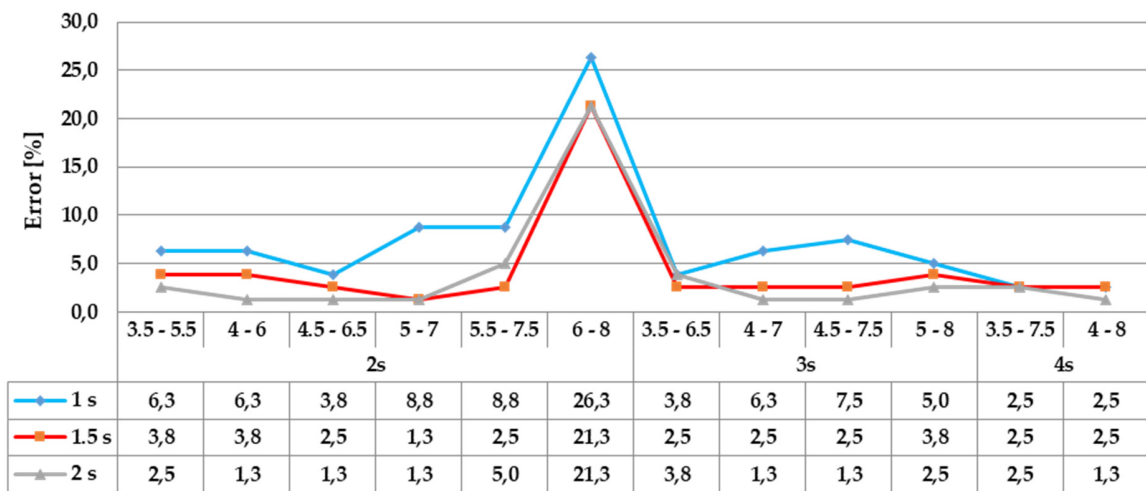

**Figure S10.** Subject S5, Minimal errors for different CSP time windows and three variance time windows

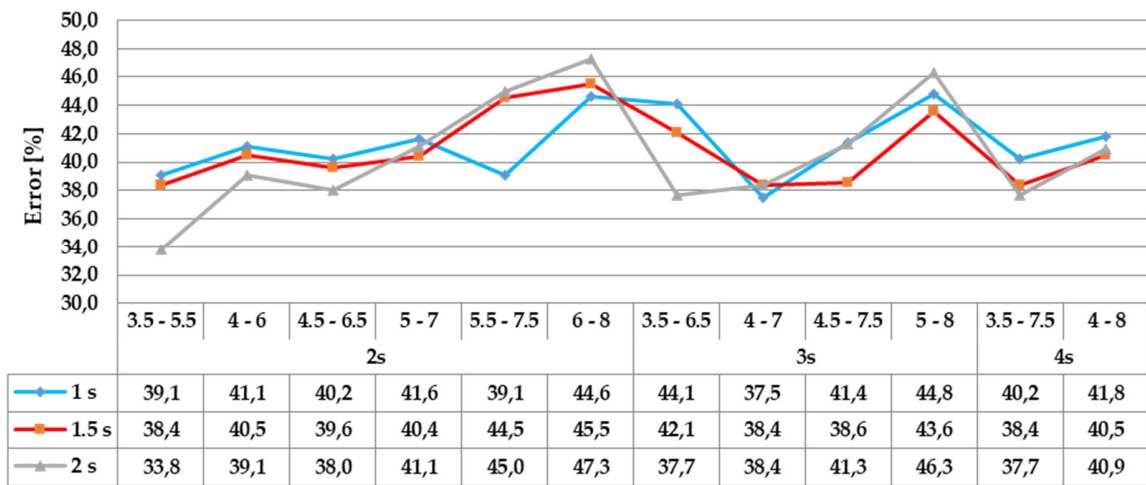

**Figure S11.** Subject S6, Mean errors for different CSP time windows and three variance time windows

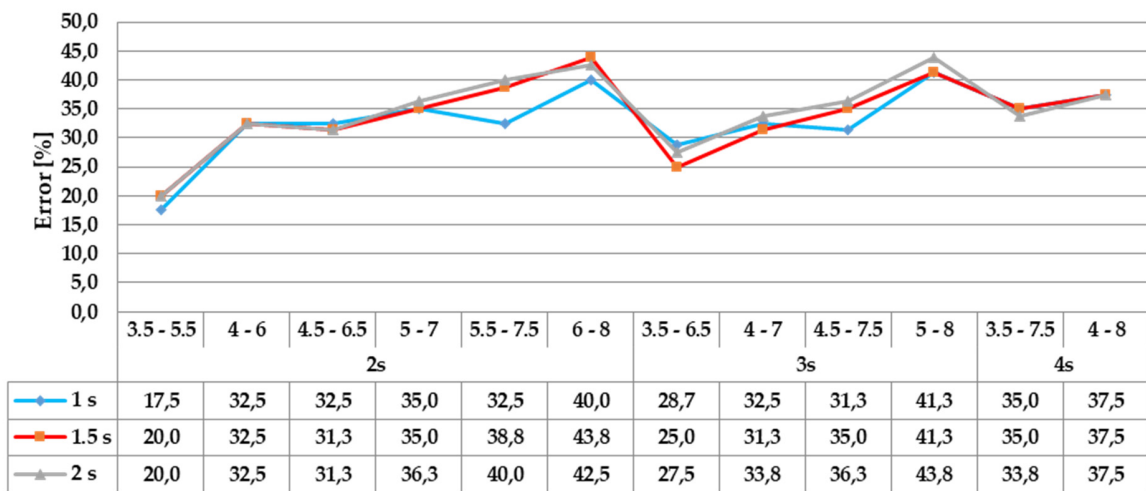

**Figure S12.** Subject S6, Minimal errors for different CSP time windows and three variance time windows

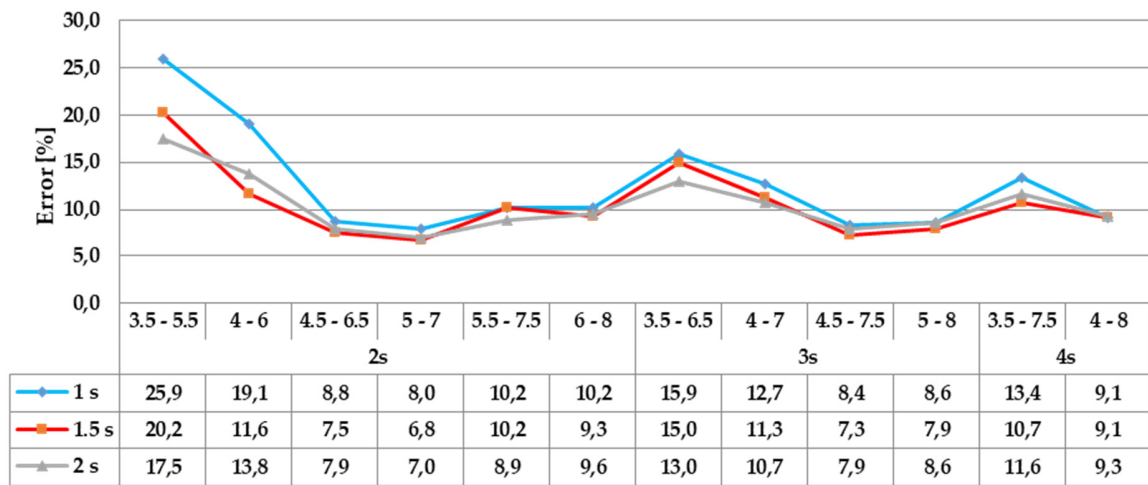

**Figure S13.** Subject S7, Mean errors for different CSP time windows and three variance time windows

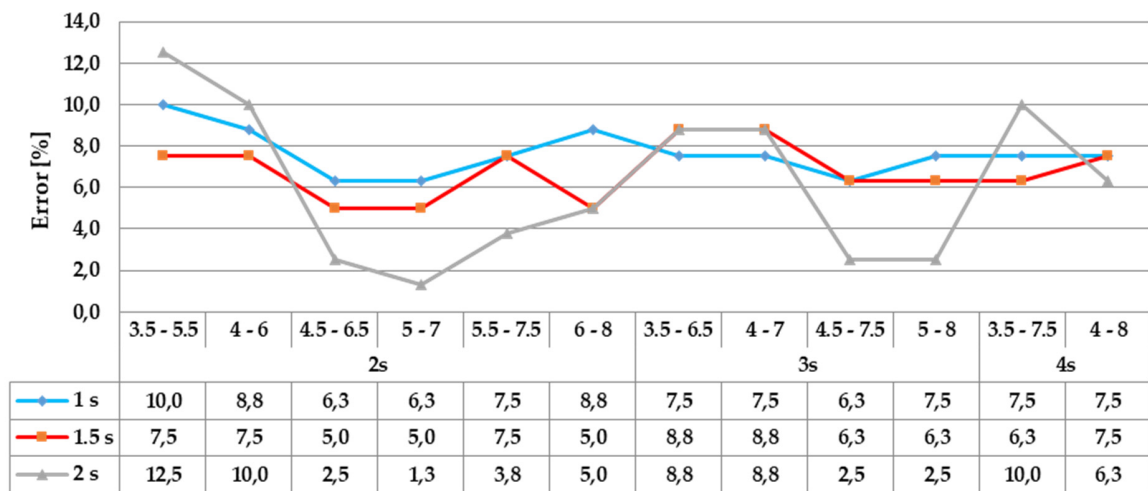

**Figure S14.** Subject S7, Minimal errors for different CSP time windows and three variance time windows
